# Supplementary material
Source: HighWire-hosted journal article supplement (https://www.jrheum.org/highwire/filestream/29681/field_highwire_adjunct_files/1/141140DataSuppl_Section2.pdf)
Supplement: 141140DataSuppl_Section2.pdf [file 141140DataSuppl_Section2.pdf]

## ONLINE SUPPLEMENTARY DATA 2

### 1. Literature search: Choosing Wisely HLA-B27 rapid review.

**Results sent to:** Tristan Boyd

**Search date:** November 30, 2013

**Databases searched:** OVID MEDLINE, MEDLINE In-Process and Other Non-Indexed Citations, Embase, All EBM Databases (see below)

**Q:** Do not order an HLA-B27 unless spondyloarthritis is suspected

**Limits:** 2000-current; English

**Filters:** Meta-analyses, systematic reviews, health technology assessments, randomized controlled trials and guidelines

Database: Ovid MEDLINE(R) 1946 to November Week 3 2013, Ovid MEDLINE(R) In-Process & Other Non-Indexed Citations November 27, 2013

Search Strategy:

| #  | Searches                                                                                                                                                                                                                                                                      | Results |
|----|-------------------------------------------------------------------------------------------------------------------------------------------------------------------------------------------------------------------------------------------------------------------------------|---------|
| 1  | expSpondylarthritis/                                                                                                                                                                                                                                                          | 19201   |
| 2  | ((ankylosingadj (spondylitis or spondylarthritis or spondyloarthritis)) or spinal arthritis or bechterew* or mariestruempell* or rheumatoid spondylitis or spondylarthritisankylopoietica or monoarticular* or oligoarticular* or dactylitis or enthesitis or uveitis).ti,ab. | 24884   |
| 3  | exp Arthritis/                                                                                                                                                                                                                                                                | 204519  |
| 4  | exp Inflammatory Bowel Diseases/                                                                                                                                                                                                                                              | 60566   |
| 5  | 3 and 4                                                                                                                                                                                                                                                                       | 1876    |
| 6  | ((inflammatory bowel disease or IBD) adj2 arthriti*).ti,ab.                                                                                                                                                                                                                   | 524     |
| 7  | or/1-2,5-6                                                                                                                                                                                                                                                                    | 36586   |
| 8  | exp HLA-B27 Antigen/                                                                                                                                                                                                                                                          | 3132    |
| 9  | (HLA B27 or (histocompatibility antigen* adj2 B27) or (human leukocyte antigen* adj2 B27)).mp.                                                                                                                                                                                | 4733    |
| 10 | or/8-9                                                                                                                                                                                                                                                                        | 4733    |
| 11 | 7 and 10                                                                                                                                                                                                                                                                      | 3202    |
| 12 | (Meta Analysis or Controlled Clinical Trial or Randomized Controlled Trial).pt.                                                                                                                                                                                               | 528241  |
| 13 | Meta-Analysis/ use mesz or exp Technology Assessment, Biomedical/ use mesz                                                                                                                                                                                                    | 61456   |
| 14 | (meta analy* or metaanaly* or pooled analysis or (systematic* adj2 review*) or published studies or published literature or medline or embase or data synthesis or data extraction or cochrane or ((health technolog* or biomedical technolog*) adj2 assess*).ti,ab.          | 175514  |
| 15 | exp Random Allocation/ use mesz or exp Double-Blind Method/ use mesz or exp Control Groups/ use mesz or exp Placebos/ use mesz                                                                                                                                                | 226069  |
| 16 | (random* or RCT or placebo* or sham* or (control* adj2 clinical trial*).ti,ab.                                                                                                                                                                                                | 869406  |
| 17 | exp Standard of Care/ use mesz or exp Guideline/ use mesz or exp Guidelines as Topic/ use mesz                                                                                                                                                                                | 140181  |
| 18 | (guideline* or guidance or consensus statement* or standard or standards).ti.                                                                                                                                                                                                 | 109873  |
| 19 | or/12-18                                                                                                                                                                                                                                                                      | 1385594 |
| 20 | 11 and 19                                                                                                                                                                                                                                                                     | 141     |
| 21 | limit 20 to (english language and yr="2000 -Current")                                                                                                                                                                                                                         | 85      |

Database: Embase 1980 to 2013 Week 47

Search Strategy:

| #  | Searches                                                                                                                                                                                                                                                                      | Results |
|----|-------------------------------------------------------------------------------------------------------------------------------------------------------------------------------------------------------------------------------------------------------------------------------|---------|
| 1  | expSpondylarthritis/                                                                                                                                                                                                                                                          | 1271    |
| 2  | expSpondyloarthropathy/ or expSpondylosis/ or expAnkylosing spondylitis/ or exp reactive arthritis/ or exp psoriatic arthritis/                                                                                                                                               | 34985   |
| 3  | ((ankylosingadj (spondylitis or spondylarthritis or spondyloarthritis)) or spinal arthritis or bechterew* or mariestruempell* or rheumatoid spondylitis or spondylarthritisankylopoietica or monoarticular* or oligoarticular* or dactylitis or enthesitis or uveitis).ti,ab. | 30192   |
| 4  | exp Arthritis/                                                                                                                                                                                                                                                                | 319754  |
| 5  | exp enteritis/                                                                                                                                                                                                                                                                | 190172  |
| 6  | 4 and 5                                                                                                                                                                                                                                                                       | 11321   |
| 7  | ((inflammatory bowel disease or IBD) adj2 arthriti*).ti,ab.                                                                                                                                                                                                                   | 659     |
| 8  | or/1-3,6-7                                                                                                                                                                                                                                                                    | 60976   |
| 9  | exp HLA-B27 Antigen/                                                                                                                                                                                                                                                          | 5282    |
| 10 | (HLA B27 or (histocompatibility antigen* adj2 B27) or (human leukocyte antigen* adj2 B27)).mp.                                                                                                                                                                                | 7084    |
| 11 | or/9-10                                                                                                                                                                                                                                                                       | 7084    |
| 12 | 8 and 11                                                                                                                                                                                                                                                                      | 4910    |
| 13 | 8 and 12                                                                                                                                                                                                                                                                      | 4910    |
| 14 | Meta Analysis/ use emez or Biomedical Technology Assessment/ use emez                                                                                                                                                                                                         | 89190   |
| 15 | (meta analy* or metaanaly* or pooled analysis or (systematic* adj2 review*) or published studies or published literature or medline or embase or data synthesis or data extraction or cochrane or ((health technolog* or biomedical technolog*) adj2 assess*).ti,ab.          | 197891  |
| 16 | Randomized Controlled Trial/ use emez or exp Randomization/ use emez or exp RANDOM SAMPLE/ use emez or Double Blind Procedure/ use emez or exp Triple Blind Procedure/ use emez or exp Control Group/ use emez or exp PLACEBO/ use emez                                       | 650265  |
| 17 | (random* or RCT or placebo* or sham* or (control* adj2 clinical trial*).ti,ab.                                                                                                                                                                                                | 1007995 |
| 18 | exp Practice Guideline/ use emez or exp Professional Standard/ use emez                                                                                                                                                                                                       | 580693  |
| 19 | (guideline* or guidance or consensus statement* or standard or standards).ti.                                                                                                                                                                                                 | 132787  |
| 20 | or/14-19                                                                                                                                                                                                                                                                      | 1992075 |
| 21 | 13 and 20                                                                                                                                                                                                                                                                     | 341     |
| 22 | limit 21 to (english language and yr="2000 -Current")                                                                                                                                                                                                                         | 258     |

Database: EBM Reviews - Cochrane Database of Systematic Reviews <2005 to October 2013>, EBM Reviews - ACP Journal Club <1991 to November 2013>, EBM Reviews - Database of Abstracts of Reviews of Effects <4th Quarter 2013>, EBM Reviews - Cochrane Central Register of Controlled Trials <October 2013>, EBM Reviews - Cochrane Methodology Register <3rd Quarter 2012>, EBM Reviews - Health Technology Assessment <4th Quarter 2013>, EBM Reviews - NHS Economic Evaluation Database <4th Quarter 2013>

Search Strategy:

| # | Searches                                                                                                                                                                                                                                                                      | Results |
|---|-------------------------------------------------------------------------------------------------------------------------------------------------------------------------------------------------------------------------------------------------------------------------------|---------|
| 1 | expSpondylarthritis/                                                                                                                                                                                                                                                          | 565     |
| 2 | ((ankylosingadj (spondylitis or spondylarthritis or spondyloarthritis)) or spinal arthritis or bechterew* or mariestruempell* or rheumatoid spondylitis or spondylarthritisankylopoietica or monoarticular* or oligoarticular* or dactylitis or enthesitis or uveitis).ti,ab. | 829     |
| 3 | exp Arthritis/                                                                                                                                                                                                                                                                | 7425    |
| 4 | exp Inflammatory Bowel Diseases/                                                                                                                                                                                                                                              | 1576    |
| 5 | 3 and 4                                                                                                                                                                                                                                                                       | 12      |

|    |                                                                                                                                                                                                                                                                      |        |
|----|----------------------------------------------------------------------------------------------------------------------------------------------------------------------------------------------------------------------------------------------------------------------|--------|
| 6  | ((inflammatory bowel disease or IBD) adj2 arthriti*).ti,ab.                                                                                                                                                                                                          | 8      |
| 7  | or/1-2,5-6                                                                                                                                                                                                                                                           | 1061   |
| 8  | exp HLA-B27 Antigen/                                                                                                                                                                                                                                                 | 15     |
| 9  | (HLA B27 or (histocompatibility antigen* adj2 B27) or (human leukocyte antigen* adj2 B27)).mp.                                                                                                                                                                       | 30     |
| 10 | or/8-9                                                                                                                                                                                                                                                               | 30     |
| 11 | 7 and 10                                                                                                                                                                                                                                                             | 26     |
| 12 | Meta-Analysis/ or exp Technology Assessment, Biomedical/                                                                                                                                                                                                             | 465    |
| 13 | (meta analy* or metaanaly* or pooled analysis or (systematic* adj2 review*) or published studies or published literature or medline or embase or data synthesis or data extraction or cochrane or ((health technolog* or biomedical technolog*) adj2 assess*).ti,ab. | 36841  |
| 14 | exp Random Allocation/ or exp Double-Blind Method/ or exp Control Groups/ or exp Placebos/                                                                                                                                                                           | 123600 |
| 15 | (random* or RCT or placebo* or sham* or (control* adj2 clinical trial*).ti,ab.                                                                                                                                                                                       | 389308 |
| 16 | exp Standard of Care/ or exp Guideline/ or exp Guidelines as Topic/                                                                                                                                                                                                  | 1148   |
| 17 | (guideline* or guidance or consensus statement* or standard or standards).ti.                                                                                                                                                                                        | 7251   |
| 18 | or/12-17                                                                                                                                                                                                                                                             | 439300 |
| 19 | 11 and 18                                                                                                                                                                                                                                                            | 17     |
| 20 | limit 19 to english language [Limit not valid in CDSR,ACP Journal Club,DARE,CCTR,CLCMR; records were retained]                                                                                                                                                       | 17     |
| 21 | limit 20 to yr="2000 -Current" [Limit not valid in DARE; records were retained]                                                                                                                                                                                      | 15     |

## **2. Choosing Wisely ANA search strategy.**

**Sent to:** Zarnaz Bagheri

**Search date:** December 1, 2013

**Databases searched:** Ovid MEDLINE(R) 1946 to November Week 3 2013, Ovid MEDLINE(R) In-Process & Other Non-Indexed Citations November 27, 2013

**Q:** Do not order ANA unless connective tissue disease suspected

**Limits:** 2000-current; English

**Filters:** Meta-analyses, systematic reviews, health technology assessments, randomized controlled trials and guidelines

Search Strategy:

| #  | Searches                                                                                                                                                                                                                                                                                           | Results |
|----|----------------------------------------------------------------------------------------------------------------------------------------------------------------------------------------------------------------------------------------------------------------------------------------------------|---------|
| 1  | exp Antibodies, Antinuclear/                                                                                                                                                                                                                                                                       | 13335   |
| 2  | expAutoantigens/                                                                                                                                                                                                                                                                                   | 20386   |
| 3  | exp Autoantibodies/                                                                                                                                                                                                                                                                                | 84486   |
| 4  | Antigens, Nuclear/                                                                                                                                                                                                                                                                                 | 3830    |
| 5  | expRibonucleoproteins/                                                                                                                                                                                                                                                                             | 30937   |
| 6  | exp DNA Topoisomerases, Type I/ or exp DNA Topoisomerases, Type II/                                                                                                                                                                                                                                | 11258   |
| 7  | (Anti-SSB* or anti-ssa* or anti-ro or (Anti?nuclear adj2 Antibod*) or ANA or Extractable Nuclear Antigen* or ENA or anti-RNP or anti?ribonucleoprotein* or anti-Sm or anti-Smith or anti-Scl-70 or anti?topoisomerase or anti-Jo-1 or anti-DS-DNA or anti-dsdna or anti-scl70 ort anti-jo1).ti,ab. | 16684   |
| 8  | "anti-Ro/ssa".mp.                                                                                                                                                                                                                                                                                  | 451     |
| 9  | or/1-8                                                                                                                                                                                                                                                                                             | 147266  |
| 10 | exp Arthralgia/                                                                                                                                                                                                                                                                                    | 7750    |
| 11 | exp Arthritis/                                                                                                                                                                                                                                                                                     | 204519  |
| 12 | exp Myositis/                                                                                                                                                                                                                                                                                      | 16021   |
| 13 | (arthritides or arthralgia* or (joint adj2 pain*) or ankylosing spondylitis or mariestruempell* or bechterew* or arthritis or pneumoconiosis or (felty* adj2 syndrome*) or caplan* syndrome* or spondyloarthritis or Sjogren* syndrome or Scleroderma or                                           | 179881  |

|    |                                                                                                                                                                                                                                                                      |         |
|----|----------------------------------------------------------------------------------------------------------------------------------------------------------------------------------------------------------------------------------------------------------------------|---------|
|    | inflammatorymyopath* or myositis or Dermatomyositis or Arthritis).ti,ab.                                                                                                                                                                                             |         |
| 14 | or/10-13                                                                                                                                                                                                                                                             | 283825  |
| 15 | 9 and 14                                                                                                                                                                                                                                                             | 16913   |
| 16 | exp lupus erythematosus, cutaneous/ or exp lupus erythematosus, systemic/                                                                                                                                                                                            | 52782   |
| 17 | lupus.ti,ab.                                                                                                                                                                                                                                                         | 59028   |
| 18 | or/16-17                                                                                                                                                                                                                                                             | 69756   |
| 19 | 15 and 18                                                                                                                                                                                                                                                            | 4082    |
| 20 | (Meta Analysis or Controlled Clinical Trial or Randomized Controlled Trial).pt.                                                                                                                                                                                      | 528241  |
| 21 | Meta-Analysis/ or exp Technology Assessment, Biomedical/                                                                                                                                                                                                             | 61486   |
| 22 | (meta analy* or metaanaly* or pooled analysis or (systematic* adj2 review*) or published studies or published literature or medline or embase or data synthesis or data extraction or cochrane or ((health technolog* or biomedical technolog*) adj2 assess*).ti,ab. | 175514  |
| 23 | exp Random Allocation/ or exp Double-Blind Method/ or exp Control Groups/ or exp Placebos/                                                                                                                                                                           | 226071  |
| 24 | (random* or RCT or placebo* or sham* or (control* adj2 clinical trial*).ti,ab.                                                                                                                                                                                       | 869406  |
| 25 | exp Standard of Care/ or exp Guideline/ or exp Guidelines as Topic/                                                                                                                                                                                                  | 140220  |
| 26 | (guideline* or guidance or consensus statement* or standard or standards).ti.                                                                                                                                                                                        | 109873  |
| 27 | or/20-26                                                                                                                                                                                                                                                             | 1385604 |
| 28 | 19 and 27                                                                                                                                                                                                                                                            | 104     |
| 29 | limit 28 to (english language and yr="2003 -Current")                                                                                                                                                                                                                | 50      |

Database: Embase 1980 to 2013 Week 47

Search Strategy:

| #  | Searches                                                                                                                                                                                                                                                                                                                          | Results |
|----|-----------------------------------------------------------------------------------------------------------------------------------------------------------------------------------------------------------------------------------------------------------------------------------------------------------------------------------|---------|
| 1  | exp antinuclear antibody/                                                                                                                                                                                                                                                                                                         | 17150   |
| 2  | expautoantigen/                                                                                                                                                                                                                                                                                                                   | 11388   |
| 3  | exp autoantibody/                                                                                                                                                                                                                                                                                                                 | 145288  |
| 4  | exp cell nucleus antigen/                                                                                                                                                                                                                                                                                                         | 4009    |
| 5  | expribonucleoprotein/                                                                                                                                                                                                                                                                                                             | 7817    |
| 6  | exp DNA topoisomerase/                                                                                                                                                                                                                                                                                                            | 7589    |
| 7  | (Anti-SSB* or anti-ssa* or anti-ro or (Anti?nuclear adj2 Antibod*) or ANA or Extractable Nuclear Antigen* or ENA or anti-RNP or anti?ribonucleoprotein* or anti-Sm or anti-Smith or anti-Scl-70 or anti?topoisomerase or anti-Jo-1 or anti-DS-DNA or anti-dsna or anti-scl70 ort anti-jo1).ti,ab.                                 | 22167   |
| 8  | "anti-Ro/ssa".mp.                                                                                                                                                                                                                                                                                                                 | 594     |
| 9  | or/1-8                                                                                                                                                                                                                                                                                                                            | 178670  |
| 10 | exp Arthralgia/                                                                                                                                                                                                                                                                                                                   | 34252   |
| 11 | exp Arthritis/                                                                                                                                                                                                                                                                                                                    | 319754  |
| 12 | exp Myositis/                                                                                                                                                                                                                                                                                                                     | 25237   |
| 13 | exp scleroderma/ or expdermatomyositis/ or expankylosing spondylitis/ or expSjogren syndrome/ or exp pneumoconiosis/                                                                                                                                                                                                              | 75664   |
| 14 | (arthritides or arthralgia* or (joint adj2 pain*) or ankylosing spondylitis or mariestruempell* or bechterew* or arthritis or pneumoconiosis or (felty* adj2 syndrome*) or caplan* syndrome* or spondyloarthritis or Sjogren* syndrome or Scleroderma or inflammatorymyopath* or myositis or Dermatomyositis or Arthritis).ti,ab. | 217777  |
| 15 | or/10-14                                                                                                                                                                                                                                                                                                                          | 435454  |
| 16 | 9 and 15                                                                                                                                                                                                                                                                                                                          | 25384   |
| 17 | exp lupus erythematosus, cutaneous/ or exp lupus erythematosus, systemic/                                                                                                                                                                                                                                                         | 66033   |
| 18 | exp lupus erythematosus/                                                                                                                                                                                                                                                                                                          | 75997   |
| 19 | lupus.ti,ab.                                                                                                                                                                                                                                                                                                                      | 68891   |
| 20 | or/17-19                                                                                                                                                                                                                                                                                                                          | 90350   |
| 21 | 16 and 20                                                                                                                                                                                                                                                                                                                         | 7250    |
| 22 | Meta Analysis/ use emez or Biomedical Technology Assessment/ use emez                                                                                                                                                                                                                                                             | 89190   |

|    |                                                                                                                                                                                                                                                                      |         |
|----|----------------------------------------------------------------------------------------------------------------------------------------------------------------------------------------------------------------------------------------------------------------------|---------|
| 23 | (meta analy* or metaanaly* or pooled analysis or (systematic* adj2 review*) or published studies or published literature or medline or embase or data synthesis or data extraction or cochrane or ((health technolog* or biomedical technolog*) adj2 assess*).ti,ab. | 197891  |
| 24 | Randomized Controlled Trial/ use emez or exp Randomization/ use emez or exp RANDOM SAMPLE/ use emez or Double Blind Procedure/ use emez or exp Triple Blind Procedure/ use emez or exp Control Group/ use emez or exp PLACEBO/ use emez                              | 650265  |
| 25 | (random* or RCT or placebo* or sham* or (control* adj2 clinical trial*).ti,ab.                                                                                                                                                                                       | 1007995 |
| 26 | exp Practice Guideline/ use emez or exp Professional Standard/ use emez                                                                                                                                                                                              | 580693  |
| 27 | (guideline* or guidance or consensus statement* or standard or standards).ti.                                                                                                                                                                                        | 132787  |
| 28 | or/22-27                                                                                                                                                                                                                                                             | 1992075 |
| 29 | 21 and 28                                                                                                                                                                                                                                                            | 574     |
| 30 | limit 29 to (english language and yr="2003 -Current")                                                                                                                                                                                                                | 456     |

Databases: EBM Reviews - Cochrane Database of Systematic Reviews 2005 to October 2013, EBM Reviews - ACP Journal Club 1991 to November 2013, EBM Reviews - Database of Abstracts of Reviews of Effects 4th Quarter 2013, EBM Reviews - Cochrane Central Register of Controlled Trials October 2013, EBM Reviews - Cochrane Methodology Register 3rd Quarter 2012, EBM Reviews - Health Technology Assessment 4th Quarter 2013, EBM Reviews - NHS Economic Evaluation Database 4th Quarter 2013  
Search strategy:

| #  | Searches                                                                                                                                                                                                                                                                                                                          | Results |
|----|-----------------------------------------------------------------------------------------------------------------------------------------------------------------------------------------------------------------------------------------------------------------------------------------------------------------------------------|---------|
| 1  | exp Antibodies, Antinuclear/                                                                                                                                                                                                                                                                                                      | 85      |
| 2  | exp Autoantigens/                                                                                                                                                                                                                                                                                                                 | 62      |
| 3  | exp Autoantibodies/                                                                                                                                                                                                                                                                                                               | 801     |
| 4  | Antigens, Nuclear/                                                                                                                                                                                                                                                                                                                | 10      |
| 5  | exp Ribonucleoproteins/                                                                                                                                                                                                                                                                                                           | 36      |
| 6  | exp DNA Topoisomerases, Type I/ or exp DNA Topoisomerases, Type II/                                                                                                                                                                                                                                                               | 25      |
| 7  | (Anti-SSB* or anti-ssa* or anti-ro or (Anti?nuclear adj2 Antibod*) or ANA or Extractable Nuclear Antigen* or ENA or anti-RNP or anti?ribonucleoprotein* or anti-Sm or anti-Smith or anti-Scl-70 or anti?topoisomerase or anti-Jo-1 or anti-DS-DNA or anti-dsdna or anti-scl70 ort anti-jo1).ti,ab.                                | 241     |
| 8  | "anti-Ro/ssa".mp.                                                                                                                                                                                                                                                                                                                 | 0       |
| 9  | or/1-8                                                                                                                                                                                                                                                                                                                            | 1083    |
| 10 | exp Arthralgia/                                                                                                                                                                                                                                                                                                                   | 635     |
| 11 | exp Arthritis/                                                                                                                                                                                                                                                                                                                    | 7425    |
| 12 | exp Myositis/                                                                                                                                                                                                                                                                                                                     | 70      |
| 13 | (arthritides or arthralgia* or (joint adj2 pain*) or ankylosing spondylitis or mariestruempell* or bechterew* or arthritis or pneumoconiosis or (felty* adj2 syndrome*) or caplan* syndrome* or spondyloarthritis or Sjogren* syndrome or Scleroderma or inflammatorymyopath* or myositis or Dermatomyositis or Arthritis).ti,ab. | 8129    |
| 14 | or/10-13                                                                                                                                                                                                                                                                                                                          | 11528   |
| 15 | 9 and 14                                                                                                                                                                                                                                                                                                                          | 159     |
| 16 | exp lupus erythematosus, cutaneous/ or exp lupus erythematosus, systemic/                                                                                                                                                                                                                                                         | 451     |
| 17 | lupus.ti,ab.                                                                                                                                                                                                                                                                                                                      | 823     |
| 18 | or/16-17                                                                                                                                                                                                                                                                                                                          | 858     |
| 19 | 15 and 18                                                                                                                                                                                                                                                                                                                         | 18      |
| 20 | (Meta Analysis or Controlled Clinical Trial or Randomized Controlled Trial).pt.                                                                                                                                                                                                                                                   | 402848  |
| 21 | Meta-Analysis/ or exp Technology Assessment, Biomedical/                                                                                                                                                                                                                                                                          | 465     |
| 22 | (meta analy* or metaanaly* or pooled analysis or (systematic* adj2 review*) or published studies or published literature or medline or embase or data synthesis or data extraction or cochrane or ((health technolog* or biomedical technolog*) adj2 assess*).ti,ab.                                                              | 36841   |
| 23 | exp Random Allocation/ or exp Double-Blind Method/ or exp Control Groups/ or exp Placebos/                                                                                                                                                                                                                                        | 123600  |

|    |                                                                                                                                         |        |
|----|-----------------------------------------------------------------------------------------------------------------------------------------|--------|
| 24 | (random* or RCT or placebo* or sham* or (control* adj2 clinical trial*)).ti,ab.                                                         | 389308 |
| 25 | exp Standard of Care/ or exp Guideline/ or exp Guidelines as Topic/                                                                     | 1148   |
| 26 | (guideline* or guidance or consensus statement* or standard or standards).ti.                                                           | 7251   |
| 27 | or/20-26                                                                                                                                | 547128 |
| 28 | 19 and 27                                                                                                                               | 18     |
| 29 | limit 28 to (english language and yr="2003 -Current") [Limit not valid in CDSR,ACP Journal Club,DARE,CCTR,CLCMR; records were retained] | 5      |

### **3. Search Strategy for Choosing Wisely Bone density tests.**

**Search date:** December 11, 2013

**Databases searched:** Ovid MEDLINE(R) 1946 to November Week 3 2013, Embase, CDSR, CCRCT

**Q:** Best frequency of completing bone density tests

**Limits:** 2003-current; English, human, adult

**Filters:** Meta-analyses, systematic reviews, health technology assessments, randomized controlled trials and guidelines

#### **Medline:**

Ovid Technologies, Inc. Email Service ----- Search for: limit 12 to (english language and humans and yr="2003 -Current" and "all adult (19 plus years)" and (guideline or meta analysis or randomized controlled trial or systematic reviews or technical report)) Results: 405

Database: Ovid MEDLINE(R) <1996 to Present> Search Strategy:

-----  
1 exp Osteoporosis/ (30034)  
2 osteopenia.mp. (4814)  
3 1 or 2 (32910)  
4 exp Bone Density/ (32814)  
5 (Dual X-ray absorptiometry or dual energy X-ray absorptiometry or DXA or DEXA).mp. [mp=title, abstract, original title, name of substance word, subject heading word, keyword heading word, protocol supplementary concept, rare disease supplementary concept, unique identifier] (14862)  
6 exp Absorptiometry, Photon/ (13069)  
7 5 or 6 (19597)  
8 3 and 7 (6668)  
9 limit 8 to (case reports or comment or congresses or editorial or letter) (385)  
10 8 not 9 (6283)  
11 limit 10 to (english language and humans and yr="2003 -Current" and "all adult (19 plus years)" and (guideline or meta analysis or randomized controlled trial or systematic reviews or technical report)) (405)

#### **EmBase**

Ovid Technologies, Inc. Email Service

-----  
Search for: from 12 [limit 8 to (english language and yr="2003 -Current")] keep 3-7,12,14-16,18-26,28-29,31,34,36-38

Results: 25

Database: Embase <1974 to 2013 Week 49>

Search Strategy:

-----  
1 (frequency and bone density test\*).mp. [mp=title, abstract, subject headings, heading word, drug trade name, original title, device manufacturer, drug manufacturer, device trade name, keyword] (12)  
2 exp osteoporosis/ or exp osteopenia/ (93919)  
3 exp dual energy X ray absorptiometry/ (19674)  
4 2 and 3 (7765)  
5 limit 4 to (english language and yr="2003 -Current" and adult <18 to 64 years>) (2537)

- 6 "reimbursement"/ (36033)
- 7 4 and 6 (34)
- 8 1 or 7 (45)
- 9 limit 8 to (english language and yr="2003 -Current" and (adult <18 to 64 years> or aged <65+ years>)) (11)
- 10 limit 9 to ((meta analysis or "systematic review") and randomized controlled trial and article) (0)
- 11 limit 9 to ((controlled clinical trial or multicenter study or phase 1 clinical trial or phase 2 clinical trial or phase 3 clinical trial or phase 4 clinical trial) and (book or book series or conference abstract or conference paper or conference proceeding or "conference review" or editorial or erratum or journal or letter or note or report or short survey or trade journal)) (0)
- 12 limit 8 to (english language and yr="2003 -Current") (38)
- 13 from 12 keep 3-7,12,14-16,18-26,28-29,31,34,36-38 (25)

**CDSR**

Ovid Technologies, Inc. Email Service ----- Search for: limit 5 to last 10 years Results: 32

Database: EBM Reviews - Cochrane Database of Systematic Reviews <2005 to October 2013> Search Strategy:

- 
- 1 (osteopenia or osteoporosis).mp. [mp=title, short title, abstract, full text, keywords, caption text] (358)
  - 2 (Dual X-ray absorptiometry or dual energy X-ray absorptiometry or DXA or DEXA).mp. [mp=title, short title, abstract, full text, keywords, caption text] (86)
  - 3 "bone density test".mp. [mp=title, short title, abstract, full text, keywords, caption text] (0)
  - 4 adult\*.mp. (4612)
  - 5 1 and 2 and 4 (34)
  - 6 limit 5 to last 10 years (32)

**4. Literature search: Choosing Wisely bisphosphonate rapid review.**

**Results sent to:** Michelle Jung

**Search date:** November 30, 2013

**Databases searched:** OVID MEDLINE, MEDLINE In-Process and Other Non-Indexed Citations, Embase, All EBM Databases (see below)

**Q:** What is the evidence from the literature recommending against the use of bisphosphonates in patients at low risk of fracture?

**Limits:** 2008-current; English

**Filters:** Meta-analyses, systematic reviews, health technology assessments and guidelines. Randomized controlled trials from 2012 to 2013 only

Database: Ovid MEDLINE(R) 1946 to November Week 3 2013, Ovid MEDLINE(R) In-Process & Other Non-Indexed Citations November 27, 2013

Search Strategy:

| # | Searches                                                                                                                                               | Results |
|---|--------------------------------------------------------------------------------------------------------------------------------------------------------|---------|
| 1 | exp Hip Fractures/                                                                                                                                     | 17827   |
| 2 | exp Spinal Fractures/                                                                                                                                  | 10474   |
| 3 | ((hip* or femur* or femoral* or trochant* or petrochant* or intertrochant* or subtrochant* or intracapsular* or extracapsular*) adj4 fracture*).ti,ab. | 27962   |
| 4 | ((hip* or ((femur* or femoral*) adj3 (head or neck or proximal))) adj4 fracture*).ti,ab.                                                               | 19295   |
| 5 | ((vertebra* or spinal) adj2 fracture*).ti,ab.                                                                                                          | 9243    |
| 6 | or/1-5                                                                                                                                                 | 46319   |

|    |                                                                                                                                                                                                        |         |
|----|--------------------------------------------------------------------------------------------------------------------------------------------------------------------------------------------------------|---------|
| 7  | expDiphosphonates/                                                                                                                                                                                     | 21384   |
| 8  | (bisphosphonate* or diphosphonate* or diphosphonic acid derivative*).ti,ab.                                                                                                                            | 14879   |
| 9  | or/7-8                                                                                                                                                                                                 | 25873   |
| 10 | 6 and 9                                                                                                                                                                                                | 2546    |
| 11 | Meta Analysis.pt.                                                                                                                                                                                      | 52243   |
| 12 | Meta-Analysis/ use mesz or exp Technology Assessment, Biomedical/ use mesz                                                                                                                             | 61456   |
| 13 | (meta analy* or metaanaly* or pooled analysis or (systematic* adj2 review*) or published studies or published literature or medline or embase or data synthesis or data extraction or cochrane).ti,ab. | 174188  |
| 14 | ((health technolog* or biomedical technolog*) adj2 assess*).ti,ab.                                                                                                                                     | 2109    |
| 15 | exp Standard of Care/ use mesz or exp Guideline/ use mesz or exp Guidelines as Topic/ use mesz                                                                                                         | 140181  |
| 16 | (guideline* or guidance or consensus statement* or standard or standards).ti.                                                                                                                          | 109873  |
| 17 | (guideline or practice guideline).pt.                                                                                                                                                                  | 25427   |
| 18 | validat*.mp.                                                                                                                                                                                           | 306756  |
| 19 | or/11-18                                                                                                                                                                                               | 685766  |
| 20 | 10 and 19                                                                                                                                                                                              | 330     |
| 21 | limit 20 to (english language and yr="2008 -Current")                                                                                                                                                  | 136     |
| 22 | Randomized Controlled Trial.pt.                                                                                                                                                                        | 391413  |
| 23 | exp Random Allocation/ or exp Double-Blind Method/ or exp Control Groups/ or exp Placebos/                                                                                                             | 226071  |
| 24 | (random* or RCT or placebo* or sham* or (control* adj2 clinical trial*)).ti,ab.                                                                                                                        | 869406  |
| 25 | or/22-24                                                                                                                                                                                               | 1016059 |
| 26 | 10 and 25                                                                                                                                                                                              | 751     |
| 27 | limit 26 to (english language and yr="2012 -Current")                                                                                                                                                  | 84      |

Database: Embase 1980 to 2013 Week 47

Search Strategy:

| #  | Searches                                                                                                                                                                                                                                                             | Results |
|----|----------------------------------------------------------------------------------------------------------------------------------------------------------------------------------------------------------------------------------------------------------------------|---------|
| 1  | exp Hip Fracture/                                                                                                                                                                                                                                                    | 28585   |
| 2  | exp spine fracture/                                                                                                                                                                                                                                                  | 13518   |
| 3  | ((hip* or femur* or femoral* or trochant* or petrochant* or intertrochant* or subtrochant* or intracapsular* or extracapsular*) adj4 fracture*).ti,ab.                                                                                                               | 33296   |
| 4  | ((hip* or ((femur* or femoral*) adj3 (head or neck or proximal))) adj4 fracture*).ti,ab.                                                                                                                                                                             | 23212   |
| 5  | ((vertebra* or spinal) adj2 fracture*).ti,ab.                                                                                                                                                                                                                        | 11943   |
| 6  | or/1-5                                                                                                                                                                                                                                                               | 61325   |
| 7  | expbisphosphonic acid derivative/                                                                                                                                                                                                                                    | 43480   |
| 8  | (bisphosphonate* or diphosphonate* or diphosphonic acid derivative*).ti,ab.                                                                                                                                                                                          | 18894   |
| 9  | or/7-8                                                                                                                                                                                                                                                               | 46795   |
| 10 | 6 and 9                                                                                                                                                                                                                                                              | 5368    |
| 11 | Meta Analysis/ or Biomedical Technology Assessment/                                                                                                                                                                                                                  | 89190   |
| 12 | (meta analy* or metaanaly* or pooled analysis or (systematic* adj2 review*) or published studies or published literature or medline or embase or data synthesis or data extraction or cochrane or ((health technolog* or biomedical technolog*) adj2 assess*).ti,ab. | 197891  |
| 13 | exp Practice Guideline/ or exp Professional Standard/                                                                                                                                                                                                                | 580693  |
| 14 | (guideline* or guidance or consensus statement* or standard or standards).ti.                                                                                                                                                                                        | 132787  |
| 15 | validat*.mp.                                                                                                                                                                                                                                                         | 377810  |
| 16 | or/11-15                                                                                                                                                                                                                                                             | 1221793 |
| 17 | 10 and 16                                                                                                                                                                                                                                                            | 920     |
| 18 | limit 17 to (english language and yr="2008 -Current")                                                                                                                                                                                                                | 464     |
| 19 | Randomized Controlled Trial/ or exp Randomization/ or exp RANDOM SAMPLE/ or Double Blind Procedure/ or exp Triple Blind Procedure/ or exp Control Group/ or exp                                                                                                      | 650265  |



|    |                                                                                 |         |
|----|---------------------------------------------------------------------------------|---------|
|    | PLACEBO/                                                                        |         |
| 20 | (random* or RCT or placebo* or sham* or (control* adj2 clinical trial*)).ti,ab. | 1007995 |
| 21 | or/19-20                                                                        | 1247411 |
| 22 | 10 and 21                                                                       | 1854    |
| 23 | limit 22 to (english language and yr="2012 -Current")                           | 297     |

Database: EBM Reviews - Cochrane Database of Systematic Reviews <2005 to October 2013>, EBM Reviews - ACP Journal Club <1991 to November 2013>, EBM Reviews - Database of Abstracts of Reviews of Effects <4th Quarter 2013>, EBM Reviews - Cochrane Central Register of Controlled Trials <October 2013>, EBM Reviews - Cochrane Methodology Register <3rd Quarter 2012>, EBM Reviews - Health Technology Assessment <4th Quarter 2013>, EBM Reviews - NHS Economic Evaluation Database <4th Quarter 2013>

Search Strategy:

| #  | Searches                                                                                                                                                                                               | Results |
|----|--------------------------------------------------------------------------------------------------------------------------------------------------------------------------------------------------------|---------|
| 1  | exp Hip Fractures/                                                                                                                                                                                     | 903     |
| 2  | exp Spinal Fractures/                                                                                                                                                                                  | 503     |
| 3  | ((hip* or femur* or femoral* or trochant* or petrochant* or intertrochant* or subtrochant* or intracapsular* or extracapsular*) adj4 fracture*).ti,ab.                                                 | 2356    |
| 4  | ((hip* or ((femur* or femoral*) adj3 (head or neck or proximal))) adj4 fracture*).ti,ab.                                                                                                               | 1932    |
| 5  | ((vertebra* or spinal) adj2 fracture*).ti,ab.                                                                                                                                                          | 899     |
| 6  | or/1-5                                                                                                                                                                                                 | 3353    |
| 7  | expDiphosphonates/                                                                                                                                                                                     | 1656    |
| 8  | (bisphosphonate* or diphosphonate* or diphosphonic acid derivative*).ti,ab.                                                                                                                            | 948     |
| 9  | or/7-8                                                                                                                                                                                                 | 1942    |
| 10 | 6 and 9                                                                                                                                                                                                | 362     |
| 11 | Meta Analysis.pt.                                                                                                                                                                                      | 488     |
| 12 | [Meta-Analysis/ use mesz or exp Technology Assessment, Biomedical/ use mesz]                                                                                                                           | 0       |
| 13 | (meta analy* or metaanaly* or pooled analysis or (systematic* adj2 review*) or published studies or published literature or medline or embase or data synthesis or data extraction or cochrane).ti,ab. | 36433   |
| 14 | ((health technolog* or biomedical technolog*) adj2 assess*).ti,ab.                                                                                                                                     | 623     |
| 15 | [exp Standard of Care/ use mesz or exp Guideline/ use mesz or exp Guidelines as Topic/ use mesz]                                                                                                       | 0       |
| 16 | (guideline* or guidance or consensus statement* or standard or standards).ti.                                                                                                                          | 7251    |
| 17 | (guideline or practice guideline).pt.                                                                                                                                                                  | 30      |
| 18 | validat*.mp.                                                                                                                                                                                           | 12981   |
| 19 | or/11-18                                                                                                                                                                                               | 53259   |
| 20 | 10 and 19                                                                                                                                                                                              | 26      |
| 21 | limit 20 to (english language and yr="2008 -Current") [Limit not valid in CDSR,ACP Journal Club,DARE,CCTR,CLCMR; records were retained]                                                                | 9       |
| 22 | Randomized Controlled Trial.pt.                                                                                                                                                                        | 325102  |
| 23 | exp Random Allocation/ or exp Double-Blind Method/ or exp Control Groups/ or exp Placebos/                                                                                                             | 123600  |
| 24 | (random* or RCT or placebo* or sham* or (control* adj2 clinical trial*)).ti,ab.                                                                                                                        | 389308  |
| 25 | or/22-24                                                                                                                                                                                               | 471448  |
| 26 | 10 and 25                                                                                                                                                                                              | 323     |
| 27 | limit 26 to (english language and yr="2012 -Current") [Limit not valid in CDSR,ACP Journal Club,DARE,CCTR,CLCMR; records were retained]                                                                | 9       |

### **5. Literature search: Choosing Wisely bone scans rapid review.**

**Results sent to:** Damian Frackowick

**Search date:** December 1, 2013

**Databases searched:** OVID MEDLINE, MEDLINE In-Process and Other Non-Indexed Citations, Embase, All EBM Databases (see below)

**Q:** What is the role of total body bone scan to diagnosis and monitor axial or peripheral inflammatory arthritis?

**Limits:** 2000-current; English

**Filters:** Meta-analyses, systematic reviews, health technology assessments, randomized controlled trials and guidelines.

Databases: Ovid MEDLINE(R) 1946 to November Week 3 2013, Ovid MEDLINE(R) In-Process & Other Non-Indexed Citations November 27, 2013

Search Strategy:

| #  | Searches                                                                                                                                                                                                                                                             | Results |
|----|----------------------------------------------------------------------------------------------------------------------------------------------------------------------------------------------------------------------------------------------------------------------|---------|
| 1  | exp Arthritis, Rheumatoid/                                                                                                                                                                                                                                           | 102046  |
| 2  | expankylosing spondylitis/                                                                                                                                                                                                                                           | 11804   |
| 3  | expSpondylarthritis/                                                                                                                                                                                                                                                 | 19201   |
| 4  | or/1-3                                                                                                                                                                                                                                                               | 117296  |
| 5  | exp Arthritis/                                                                                                                                                                                                                                                       | 204519  |
| 6  | exp Inflammatory Bowel Diseases/                                                                                                                                                                                                                                     | 60566   |
| 7  | 5 and 6                                                                                                                                                                                                                                                              | 1876    |
| 8  | (ankylosing spondylitis or mariestruempell* or bechterew* or arthritis or pneumoconiosis or (felty* adj2 syndrome*) or caplan* syndrome* or spondyloarthritis).ti,ab.                                                                                                | 140464  |
| 9  | or/4,7-8                                                                                                                                                                                                                                                             | 180153  |
| 10 | exp Radionuclide Imaging/ or exp Technetium/                                                                                                                                                                                                                         | 126251  |
| 11 | (bone* adj2 (scan* or scintigraphy or radionuclide or gamma camera or radioisotope)).ti,ab.                                                                                                                                                                          | 11872   |
| 12 | or/10-11                                                                                                                                                                                                                                                             | 135140  |
| 13 | 9 and 12                                                                                                                                                                                                                                                             | 1302    |
| 14 | (Meta Analysis or Controlled Clinical Trial or Randomized Controlled Trial).pt.                                                                                                                                                                                      | 528241  |
| 15 | Meta-Analysis/ or exp Technology Assessment, Biomedical/                                                                                                                                                                                                             | 61456   |
| 16 | (meta analy* or metaanaly* or pooled analysis or (systematic* adj2 review*) or published studies or published literature or medline or embase or data synthesis or data extraction or cochrane or ((health technolog* or biomedical technolog*) adj2 assess*).ti,ab. | 175514  |
| 17 | exp Random Allocation/ or exp Double-Blind Method/ or exp Control Groups/ or exp Placebos/                                                                                                                                                                           | 226069  |
| 18 | (random* or RCT or placebo* or sham* or (control* adj2 clinical trial*)).ti,ab.                                                                                                                                                                                      | 869406  |
| 19 | exp Standard of Care/ or exp Guideline/ orexp Guidelines as Topic/                                                                                                                                                                                                   | 140181  |
| 20 | (guideline* or guidance or consensus statement* or standard or standards).ti.                                                                                                                                                                                        | 109873  |
| 21 | or/14-20                                                                                                                                                                                                                                                             | 1385594 |
| 22 | 13 and 21                                                                                                                                                                                                                                                            | 53      |
| 23 | limit 22 to english language                                                                                                                                                                                                                                         | 51      |
| 24 | limit 23 to yr="2000 -Current"                                                                                                                                                                                                                                       | 30      |

Database: Embase 1980 to 2013 Week 47

Search Strategy:

| #  | Searches                                                                                                                                                                                                                                                             | Results |
|----|----------------------------------------------------------------------------------------------------------------------------------------------------------------------------------------------------------------------------------------------------------------------|---------|
| 1  | exp rheumatoid arthritis/                                                                                                                                                                                                                                            | 138781  |
| 2  | expankylosing spondylitis/                                                                                                                                                                                                                                           | 17821   |
| 3  | exp pneumoconiosis/                                                                                                                                                                                                                                                  | 6691    |
| 4  | expSpondylarthritis/                                                                                                                                                                                                                                                 | 1271    |
| 5  | or/1-4                                                                                                                                                                                                                                                               | 158030  |
| 6  | exp Arthritis/                                                                                                                                                                                                                                                       | 319754  |
| 7  | exp enteritis/                                                                                                                                                                                                                                                       | 190172  |
| 8  | 6 and 7                                                                                                                                                                                                                                                              | 11321   |
| 9  | (ankylosing spondylitis or mariestruempell* or bechterew* or arthritis or pneumoconiosis or (felty* adj2 syndrome*) or caplan* syndrome* or spondyloarthritis).ti,ab.                                                                                                | 169794  |
| 10 | 5 or 8 or 9                                                                                                                                                                                                                                                          | 223105  |
| 11 | exp Technetium/                                                                                                                                                                                                                                                      | 9157    |
| 12 | exp bone scintiscanning/                                                                                                                                                                                                                                             | 19339   |
| 13 | (bone* adj2 (scan* or scintigraphy or radionuclide or gamma camera or radioisotope)).ti,ab.                                                                                                                                                                          | 15145   |
| 14 | or/11-13                                                                                                                                                                                                                                                             | 34257   |
| 15 | 10 and 14                                                                                                                                                                                                                                                            | 1338    |
| 16 | Meta Analysis/ use emez or Biomedical Technology Assessment/ use emez                                                                                                                                                                                                | 89190   |
| 17 | (meta analy* or metaanaly* or pooled analysis or (systematic* adj2 review*) or published studies or published literature or medline or embase or data synthesis or data extraction or cochrane or ((health technolog* or biomedical technolog*) adj2 assess*).ti,ab. | 197891  |
| 18 | Randomized Controlled Trial/ use emez or exp Randomization/ use emez or exp RANDOM SAMPLE/ use emez or Double Blind Procedure/ use emez or exp Triple Blind Procedure/ use emez or exp Control Group/ use emez or exp PLACEBO/ use emez                              | 650265  |
| 19 | (random* or RCT or placebo* or sham* or (control* adj2 clinical trial*).ti,ab.                                                                                                                                                                                       | 1007995 |
| 20 | exp Practice Guideline/ use emez or exp Professional Standard/ use emez                                                                                                                                                                                              | 580693  |
| 21 | (guideline* or guidance or consensus statement* or standard or standards).ti.                                                                                                                                                                                        | 132787  |
| 22 | or/16-21                                                                                                                                                                                                                                                             | 1992075 |
| 23 | 15 and 22                                                                                                                                                                                                                                                            | 60      |
| 24 | limit 23 to (english language and yr="2000 -Current")                                                                                                                                                                                                                | 41      |

Database: EBM Reviews - Cochrane Database of Systematic Reviews 2005 to October 2013, EBM Reviews - ACP Journal Club 1991 to November 2013, EBM Reviews - Database of Abstracts of Reviews of Effects 4th Quarter 2013, EBM Reviews - Cochrane Central Register of Controlled Trials October 2013, EBM Reviews - Cochrane Methodology Register 3rd Quarter 2012, EBM Reviews - Health Technology Assessment 4th Quarter 2013, EBM Reviews - NHS Economic Evaluation Database 4th Quarter 2013  
Search Strategy:

| # | Searches                                                                                                                                                              | Results |
|---|-----------------------------------------------------------------------------------------------------------------------------------------------------------------------|---------|
| 1 | exp Arthritis, Rheumatoid/                                                                                                                                            | 3785    |
| 2 | expankylosing spondylitis/                                                                                                                                            | 373     |
| 3 | expSpondylarthritis/                                                                                                                                                  | 565     |
| 4 | or/1-3                                                                                                                                                                | 4253    |
| 5 | exp Arthritis/                                                                                                                                                        | 7425    |
| 6 | exp Inflammatory Bowel Diseases/                                                                                                                                      | 1576    |
| 7 | 5 and 6                                                                                                                                                               | 12      |
| 8 | (ankylosing spondylitis or mariestruempell* or bechterew* or arthritis or pneumoconiosis or (felty* adj2 syndrome*) or caplan* syndrome* or spondyloarthritis).ti,ab. | 6757    |
| 9 | or/4,7-8                                                                                                                                                              | 7291    |

|    |                                                                                                                                                                                                                                                                      |        |
|----|----------------------------------------------------------------------------------------------------------------------------------------------------------------------------------------------------------------------------------------------------------------------|--------|
| 10 | exp Radionuclide Imaging/ or exp Technetium/                                                                                                                                                                                                                         | 2936   |
| 11 | (bone* adj2 (scan* or scintigraphy or radionuclide or gamma camera or radioisotope)).ti,ab.                                                                                                                                                                          | 271    |
| 12 | or/10-11                                                                                                                                                                                                                                                             | 3167   |
| 13 | 9 and 12                                                                                                                                                                                                                                                             | 28     |
| 14 | (Meta Analysis or Controlled Clinical Trial or Randomized Controlled Trial).pt.                                                                                                                                                                                      | 402848 |
| 15 | Meta-Analysis/ or exp Technology Assessment, Biomedical/                                                                                                                                                                                                             | 465    |
| 16 | (meta analy* or metaanaly* or pooled analysis or (systematic* adj2 review*) or published studies or published literature or medline or embase or data synthesis or data extraction or cochrane or ((health technolog* or biomedical technolog*) adj2 assess*).ti,ab. | 36841  |
| 17 | exp Random Allocation/ or exp Double-Blind Method/ or exp Control Groups/ or exp Placebos/                                                                                                                                                                           | 123600 |
| 18 | (random* or RCT or placebo* or sham* or (control* adj2 clinical trial*).ti,ab.                                                                                                                                                                                       | 389308 |
| 19 | exp Standard of Care/ or exp Guideline/ or exp Guidelines as Topic/                                                                                                                                                                                                  | 1148   |
| 20 | (guideline* or guidance or consensus statement* or standard or standards).ti.                                                                                                                                                                                        | 7251   |
| 21 | or/14-20                                                                                                                                                                                                                                                             | 547128 |
| 22 | 13 and 21                                                                                                                                                                                                                                                            | 28     |
| 23 | limit 22 to english language [Limit not valid in CDSR,ACP Journal Club,DARE,CCTR,CLCMR; records were retained]                                                                                                                                                       | 28     |
| 24 | limit 23 to yr="2000 -Current" [Limit not valid in DARE; records were retained]                                                                                                                                                                                      | 11     |

#### **Comments from the survey of CRA members on the items:**

Comments were received from 29 members (17%) responding to the survey. One of the common themes was the target audience of these statements. Many participating in the review felt that some decisions by clinicians resulted in excessive use/ additional costs or burden. One commenter said “I don't think rheumatologists are doing these things... referring GPs (family doctors) should be questioned/taught about this...hopefully rheumatologists don't work this way.”

Many agreed with these statements but would reword them and also highlighted the importance of clinical judgment in making these decisions. Another colleague asked, “Is this item high impact based on its prevalence, cost, or potential to reduce harm - challenging to answer as not all components are relevant to each scenario presented.”

Finally, others felt that that the comments were not generalizable because of difference in the investigation testing at different facilities. “ANA and sub-serology results are so variable and unreliable between the different private labs that community based physicians need some leeway here. For example, negative ANA and positive anti-dsDNA checked at university lab with anti-dsDNA correct and in another example with incorrectly positive anti-dsDNA at a different lab. I've got a drawer full of these.” Based on these comments some of the statements were reworded.
